# Supplementary material
Source: publisher site journal article supplement (https://www.dovepress.com/article/471626)
Supplement: Supplementary file 1 [file get_supplementary_file.php]

**Supplementary materials**

**Table S1.** Demographic and clinical characteristics of the training and validation sets

|  | Total (n=278) | Training set (n=223) | Validation set (n=55) |
| --- | --- | --- | --- |
| Poor prognosis (%) | 126(45.3) | 102(45.7) | 24(43.6) |
| Male (%) | 164(59.0) | 130(58.3) | 34(61.8) |
| Age | 51.00(31.00-63.00) | 51.00(30.00-64.00) | 52.00(37.00-60.00) |
| Hospitalization days | 13.00(10.00-22.00) | 13.00(10.00-22.00) | 13.00(9.00-20.00) |
| Diarrhea (%) | 50(18.0) | 46(20.6) | 4(7.3) |
| Upper respiratory tract infection (%) | 37(13.3) | 33(14.8) | 4(7.3) |
| Mechanical ventilation (%) | 42(15.1) | 38(17.0) | 4(7.3) |
| Hyporeflexia (%) | 223(80.2) | 178(79.8) | 45(81.8) |
| Abnormal glossopharyngeal vagus (%) | 48(17.3) | 43(19.3) | 5(9.1) |
| Abnormal hypoglossal nerve (%) | 14(5.0) | 1(0.4) | 13(23.6) |
| GC (%) | 46(16.5) | 44(19.7) | 2(3.6) |
| IVIG (%) | 225(80.9) | 175(78.5) | 50(90.9) |
| PE (%) | 34(12.2) | 31(13.9) | 3(5.5) |
| Blood test |  |  |  |
| WBC (10^9/L) | 7.30(5.68-9.29) | 7.18(5.71-9.22) | 8.03(5.14-9.71) |
| Neutrophil (10^9/L) | 4.96(3.42-6.63) | 4.75(3.46-6.67) | 5.63(3.23-6.97) |
| Lymphocyte (10^9/L) | 1.53(1.10-2.06) | 1.57(1.15-2.06) | 1.47(0.87-1.97) |
| NLR | 2.98(1.90-5.36) | 2.93(1.89-5.25) | 4.01(1.96-6.80) |
| Monocyte (10^9/L) | 0.48(0.38-0.66) | 0.48(0.38-0.65) | 0.47(0.36-0.68) |
| blood glucose (mmol/L) | 5.46(4.60-6.90) | 5.36(4.57-6.86) | 6.29(4.88-6.91) |
| Albumin (g/L) | 41.45(38.60-44.40) | 41.60(38.50-44.80) | 40.60(38.80-42.60) |
| Prealbumin (mg/L） | 249.94(204.00-293.00) | 254.00(195.00-307.00) | 249.94(233.00-249.94) |
| CRP (mg/L) | 3.11(1.00-9.47) | 2.61(0.95-6.66) | 6.69(1.85-15.88) |
| Thyroid Function test |  |  |  |
| FT3 (pmol/L) | 4.64(4.14-5.30) | 4.63(4.11-5.20) | 4.84(4.48-5.53) |
| FT4 (pmol/L) | 12.73(11.17-15.10) | 12.54(10.84-15.05) | 13.62(11.87-15.27) |
| TSH (uIU/mL) | 2.07(1.21-3.03) | 2.07(1.22-3.06) | 2.03(1.15-2.61) |
| CSF test |  |  |  |
| Leucocyte (10^6/L) | 2.00(2.00-4.00) | 2.00(2.00-4.00) | 3.00(2.00-6.00) |
| Lymphocyte (%) | 66.00(58.00-70.00) | 66.00(58.00-70.00) | 65.00(60.00-70.00) |
| Monocyte (%) | 32.00(25.75-38.25) | 32.00(25.00-39.00) | 31.57(26.00-37.00) |
| Protein (mg/L) | 637.25(411.68-1072.25) | 631.00(423.00-1073.00) | 681.70(384.80-1048.00) |
| Glucose (mmol/L) | 3.83(3.29-4.77) | 3.66(3.19-4.60) | 4.55(3.96-5.09) |
| CSF albumin (mg/dL) | 44.96(24.60-127.80) | 42.97(24.79-135.00) | 55.07(22.25-127.80) |
| Serum albumin (mg/dL) | 4328.50(3920.25-4749.50) | 4376.00(4004.00-4769.00) | 4006.00(3537.00-4590.00) |
| CSF IgG (mg/dL) | 13.83(5.56-34.91) | 13.95(5.42-34.23) | 12.24(7.14-63.25) |
| Serum IgG (mg/dL) | 1445.60(1011.50-3641.80) | 1351.00(969.10-3703.00) | 2024.80(1141.90-3621.40) |
| Albumin quotient (10^-3) | 9.64(5.67-16.64) | 9.71(5.43-16.39) | 10.71(6.36-18.44) |
| IgG quotient (10^-3) | 7.02(3.66-14.46) | 7.02(3.68-14.61) | 6.99(3.19-12.98) |
| IgG index | 0.74(0.58-0.93) | 0.79(0.63-0.98) | 0.59(0.47-0.70) |

Notes:

Abbreviations: GC, Glucocorticoids, IVIG, intravenous immunoglobulin, PE, plasma exchange, WBC, white blood cell, NLR, neutrophil/lymphocyte ratio, CRP, C-reactive protein, FT3, Free triiodothyronine, FT4, Free thyroxin, TSH, thyroid-stimulating hormone, CSF, cerebrospinal fluid, IgG, immunoglobulin G.
